# Supplementary material
Source: publisher figshare collection journal article supplement (https://acs.figshare.com/ndownloader/files/4212655)
Supplement: Supplementary file 1 [file 4212655]

data_Mn(BnTPEN)(OTf)~2~ 
  
_audit_creation_method            SHELXL-97 
_chemical_name_systematic 
; 
 ? 
; 
_chemical_name_common             'manganese(II) BnTPEN triflate monomethanol' 
_chemical_formula_moiety          'C30 H29 F6 Mn N5 O7 S2' 
_chemical_formula_sum             'C30 H29 F6 Mn N5 O7 S2'
_chemical_formula_weight          804.64 
  
loop_ 
 _atom_type_symbol 
 _atom_type_description 
 _atom_type_scat_dispersion_real 
 _atom_type_scat_dispersion_imag 
 _atom_type_scat_source 
 'C'  'C'   0.0033   0.0016 
 'International Tables Vol C Tables 4.2.6.8 and 6.1.1.4' 
 'H'  'H'   0.0000   0.0000 
 'International Tables Vol C Tables 4.2.6.8 and 6.1.1.4' 
 'N'  'N'   0.0061   0.0033 
 'International Tables Vol C Tables 4.2.6.8 and 6.1.1.4' 
 'O'  'O'   0.0106   0.0060 
 'International Tables Vol C Tables 4.2.6.8 and 6.1.1.4' 
 'F'  'F'   0.0171   0.0103 
 'International Tables Vol C Tables 4.2.6.8 and 6.1.1.4' 
 'S'  'S'   0.1246   0.1234 
 'International Tables Vol C Tables 4.2.6.8 and 6.1.1.4' 
 'Mn'  'Mn'   0.3368   0.7283 
 'International Tables Vol C Tables 4.2.6.8 and 6.1.1.4' 
  
_symmetry_cell_setting            Triclinic 
_symmetry_space_group_name_H-M    P-1 
  
loop_ 
 _symmetry_equiv_pos_as_xyz 
 'x, y, z' 
 '-x, -y, -z' 
  
_cell_length_a                    9.4018(2) 
_cell_length_b                    13.7570(3) 
_cell_length_c                    15.2303(3) 
_cell_angle_alpha                 75.6050(10) 
_cell_angle_beta                  78.4760(10) 
_cell_angle_gamma                 70.6140(10) 
_cell_volume                      1784.99(6) 
_cell_formula_units_Z             2 
_cell_measurement_temperature     170(2) 
_cell_measurement_reflns_used     9936 
_cell_measurement_theta_min       2.32 
_cell_measurement_theta_max       28.26 
  
_exptl_crystal_description        Block 
_exptl_crystal_colour             colourless 
_exptl_crystal_size_max           0.30 
_exptl_crystal_size_mid           0.20 
_exptl_crystal_size_min           0.20 
_exptl_crystal_density_meas       ? 
_exptl_crystal_density_diffrn     1.497 
_exptl_crystal_density_method     'not measured' 
_exptl_crystal_F_000              822 
_exptl_absorpt_coefficient_mu     0.569 
_exptl_absorpt_correction_type    multi-scan 
_exptl_absorpt_correction_T_min   0.8478 
_exptl_absorpt_correction_T_max   0.8946 
_exptl_absorpt_process_details    ? 
  
_exptl_special_details 
; 
 ? 
; 
  
_diffrn_ambient_temperature       170(2) 
_diffrn_radiation_wavelength      0.71073 
_diffrn_radiation_type            MoK\a 
_diffrn_radiation_source          'fine-focus sealed tube' 
_diffrn_radiation_monochromator   graphite 
_diffrn_measurement_device_type   'Bruker APEX-II CCD' 
_diffrn_measurement_method        '\f and \w scans' 
_diffrn_detector_area_resol_mean  ? 
_diffrn_reflns_number             32021 
_diffrn_reflns_av_R_equivalents   0.0240 
_diffrn_reflns_av_sigmaI/netI     0.0237 
_diffrn_reflns_limit_h_min        -12 
_diffrn_reflns_limit_h_max        12 
_diffrn_reflns_limit_k_min        -18 
_diffrn_reflns_limit_k_max        18 
_diffrn_reflns_limit_l_min        -20 
_diffrn_reflns_limit_l_max        19 
_diffrn_reflns_theta_min          1.90 
_diffrn_reflns_theta_max          28.31 
_reflns_number_total              8731 
_reflns_number_gt                 7451 
_reflns_threshold_expression      >2sigma(I) 
  
_computing_data_collection        'Bruker APEX2' 
_computing_cell_refinement        'Bruker SAINT' 
_computing_data_reduction         'Bruker SAINT' 
_computing_structure_solution     'SHELXS-97 (Sheldrick, 2008)' 
_computing_structure_refinement   'SHELXL-97 (Sheldrick, 2008)' 
_computing_molecular_graphics     'Bruker SHELXTL' 
_computing_publication_material   'Bruker SHELXTL' 
  
_refine_special_details 
; 
 Refinement of F^2^ against ALL reflections.  The weighted R-factor wR and 
 goodness of fit S are based on F^2^, conventional R-factors R are based 
 on F, with F set to zero for negative F^2^. The threshold expression of 
 F^2^ > 2sigma(F^2^) is used only for calculating R-factors(gt) etc. and is 
 not relevant to the choice of reflections for refinement.  R-factors based 
 on F^2^ are statistically about twice as large as those based on F, and R- 
 factors based on ALL data will be even larger. 
; 
  
_refine_ls_structure_factor_coef  Fsqd 
_refine_ls_matrix_type            full 
_refine_ls_weighting_scheme       calc 
_refine_ls_weighting_details 
 'calc w=1/[\s^2^(Fo^2^)+(0.1019P)^2^+1.9530P] where P=(Fo^2^+2Fc^2^)/3' 
_atom_sites_solution_primary      direct 
_atom_sites_solution_secondary    difmap 
_atom_sites_solution_hydrogens    geom 
_refine_ls_hydrogen_treatment     constr 
_refine_ls_extinction_method      none 
_refine_ls_extinction_coef        ? 
_refine_ls_number_reflns          8731 
_refine_ls_number_parameters      450 
_refine_ls_number_restraints      0 
_refine_ls_R_factor_all           0.0486 
_refine_ls_R_factor_gt            0.0410 
_refine_ls_wR_factor_ref          0.1305 
_refine_ls_wR_factor_gt           0.1209 
_refine_ls_goodness_of_fit_ref    0.802 
_refine_ls_restrained_S_all       0.802 
_refine_ls_shift/su_max           0.001 
_refine_ls_shift/su_mean          0.000 
  
loop_ 
 _atom_site_label 
 _atom_site_type_symbol 
 _atom_site_fract_x 
 _atom_site_fract_y 
 _atom_site_fract_z 
 _atom_site_U_iso_or_equiv 
 _atom_site_adp_type 
 _atom_site_occupancy 
 _atom_site_symmetry_multiplicity 
 _atom_site_calc_flag 
 _atom_site_refinement_flags 
 _atom_site_disorder_assembly 
 _atom_site_disorder_group 
Mn1 Mn 0.88019(3) 0.727098(19) 0.742136(17) 0.01942(9) Uani 1 1 d . . . 
S1 S 1.18983(5) 0.62660(4) 0.84274(4) 0.03153(12) Uani 1 1 d . . . 
S2 S 0.69441(5) 0.80713(4) 0.37951(3) 0.02697(11) Uani 1 1 d . . . 
F1 F 1.1016(2) 0.56608(17) 1.01526(11) 0.0670(5) Uani 1 1 d . . . 
F2 F 1.3388(2) 0.55490(17) 0.98397(13) 0.0693(5) Uani 1 1 d . . . 
F3 F 1.1727(2) 0.70528(17) 0.98497(12) 0.0644(5) Uani 1 1 d . . . 
F4 F 0.78056(19) 0.71379(13) 0.23830(12) 0.0545(4) Uani 1 1 d . . . 
F5 F 0.83662(19) 0.85759(15) 0.21690(10) 0.0551(4) Uani 1 1 d . . . 
F6 F 0.60630(18) 0.86173(13) 0.21661(10) 0.0489(4) Uani 1 1 d . . . 
O1 O 1.03389(17) 0.69527(14) 0.83750(10) 0.0378(4) Uani 1 1 d . . . 
O2 O 1.2125(2) 0.52268(15) 0.83047(15) 0.0518(5) Uani 1 1 d . . . 
O3 O 1.30087(19) 0.67770(15) 0.79541(12) 0.0446(4) Uani 1 1 d . . . 
O4 O 0.84047(19) 0.75244(13) 0.40958(12) 0.0402(4) Uani 1 1 d . . . 
O5 O 0.6414(2) 0.91683(13) 0.38345(12) 0.0445(4) Uani 1 1 d . . . 
O6 O 0.5835(2) 0.75111(17) 0.41176(12) 0.0496(4) Uani 1 1 d . . . 
N2 N 0.81577(17) 0.59328(12) 0.70961(10) 0.0220(3) Uani 1 1 d . . . 
N1 N 0.66030(17) 0.82065(12) 0.67923(10) 0.0230(3) Uani 1 1 d . . . 
N4 N 0.90653(19) 0.88551(12) 0.67885(11) 0.0262(3) Uani 1 1 d . . . 
N3 N 0.69976(19) 0.75078(13) 0.86217(11) 0.0273(3) Uani 1 1 d . . . 
N5 N 1.07215(18) 0.65850(12) 0.63661(11) 0.0245(3) Uani 1 1 d . . . 
C27 C 1.1834(2) 0.69987(16) 0.59072(14) 0.0295(4) Uani 1 1 d . . . 
H27 H 1.1839 0.7646 0.6021 0.035 Uiso 1 1 calc R . . 
C26 C 1.2963(2) 0.65357(18) 0.52830(15) 0.0342(4) Uani 1 1 d . . . 
H26 H 1.3734 0.6850 0.4977 0.041 Uiso 1 1 calc R . . 
C25 C 1.2942(3) 0.55939(18) 0.51128(15) 0.0358(5) Uani 1 1 d . . . 
H25 H 1.3698 0.5256 0.4679 0.043 Uiso 1 1 calc R . . 
C24 C 1.1815(2) 0.51535(16) 0.55797(15) 0.0320(4) Uani 1 1 d . . . 
H24 H 1.1783 0.4510 0.5473 0.038 Uiso 1 1 calc R . . 
C23 C 1.0729(2) 0.56697(14) 0.62080(12) 0.0238(3) Uani 1 1 d . . . 
C22 C 0.9573(2) 0.51658(14) 0.67890(13) 0.0264(4) Uani 1 1 d . . . 
H22A H 0.9329 0.4741 0.6435 0.032 Uiso 1 1 calc R . . 
H22B H 1.0020 0.4684 0.7331 0.032 Uiso 1 1 calc R . . 
C2 C 0.7261(2) 0.64899(15) 0.63196(12) 0.0251(4) Uani 1 1 d . . . 
H2A H 0.6814 0.6003 0.6169 0.030 Uiso 1 1 calc R . . 
H2B H 0.7948 0.6703 0.5776 0.030 Uiso 1 1 calc R . . 
C1 C 0.5998(2) 0.74562(15) 0.65403(14) 0.0273(4) Uani 1 1 d . . . 
H1A H 0.5448 0.7811 0.6002 0.033 Uiso 1 1 calc R . . 
H1B H 0.5266 0.7238 0.7053 0.033 Uiso 1 1 calc R . . 
C16 C 0.7022(2) 0.89584(15) 0.59846(13) 0.0270(4) Uani 1 1 d . . . 
H16A H 0.6092 0.9508 0.5787 0.032 Uiso 1 1 calc R . . 
H16B H 0.7530 0.8586 0.5475 0.032 Uiso 1 1 calc R . . 
C17 C 0.8077(2) 0.94649(14) 0.62043(13) 0.0255(4) Uani 1 1 d . . . 
C18 C 0.8062(3) 1.04945(16) 0.58022(16) 0.0360(5) Uani 1 1 d . . . 
H18 H 0.7325 1.0926 0.5411 0.043 Uiso 1 1 calc R . . 
C19 C 0.9134(3) 1.08769(17) 0.59819(17) 0.0421(5) Uani 1 1 d . . . 
H19 H 0.9154 1.1574 0.5708 0.051 Uiso 1 1 calc R . . 
C20 C 1.0177(3) 1.02400(18) 0.65614(17) 0.0392(5) Uani 1 1 d . . . 
H20 H 1.0939 1.0485 0.6682 0.047 Uiso 1 1 calc R . . 
C21 C 1.0096(3) 0.92450(16) 0.69621(16) 0.0324(4) Uani 1 1 d . . . 
H21 H 1.0794 0.8815 0.7378 0.039 Uiso 1 1 calc R . . 
C10 C 0.5515(2) 0.87731(16) 0.74720(14) 0.0303(4) Uani 1 1 d . . . 
H10A H 0.4470 0.8939 0.7326 0.036 Uiso 1 1 calc R . . 
H10B H 0.5716 0.9446 0.7433 0.036 Uiso 1 1 calc R . . 
C11 C 0.5619(2) 0.81440(16) 0.84322(14) 0.0289(4) Uani 1 1 d . . . 
C12 C 0.4364(3) 0.8268(2) 0.90972(17) 0.0440(6) Uani 1 1 d . . . 
H12 H 0.3393 0.8715 0.8948 0.053 Uiso 1 1 calc R . . 
C13 C 0.4555(3) 0.7725(3) 0.99866(18) 0.0523(7) Uani 1 1 d . . . 
H13 H 0.3711 0.7793 1.0453 0.063 Uiso 1 1 calc R . . 
C14 C 0.5972(3) 0.7089(2) 1.01898(16) 0.0462(6) Uani 1 1 d . . . 
H14 H 0.6126 0.6727 1.0798 0.055 Uiso 1 1 calc R . . 
C15 C 0.7165(3) 0.69899(18) 0.94883(14) 0.0357(5) Uani 1 1 d . . . 
H15 H 0.8140 0.6539 0.9622 0.043 Uiso 1 1 calc R . . 
C3 C 0.7293(2) 0.53779(14) 0.78833(12) 0.0247(4) Uani 1 1 d . . . 
H3A H 0.6310 0.5888 0.8055 0.030 Uiso 1 1 calc R . . 
H3B H 0.7873 0.5143 0.8413 0.030 Uiso 1 1 calc R . . 
C4 C 0.6980(2) 0.44373(15) 0.77069(12) 0.0250(4) Uani 1 1 d . . . 
C9 C 0.8028(2) 0.34386(16) 0.78781(14) 0.0306(4) Uani 1 1 d . . . 
H9 H 0.8920 0.3343 0.8132 0.037 Uiso 1 1 calc R . . 
C8 C 0.7769(3) 0.25841(17) 0.76783(16) 0.0366(5) Uani 1 1 d . . . 
H8 H 0.8493 0.1909 0.7788 0.044 Uiso 1 1 calc R . . 
C7 C 0.6462(3) 0.27119(18) 0.73211(16) 0.0380(5) Uani 1 1 d . . . 
H7 H 0.6291 0.2128 0.7181 0.046 Uiso 1 1 calc R . . 
C6 C 0.5408(3) 0.36927(19) 0.71694(16) 0.0373(5) Uani 1 1 d . . . 
H6 H 0.4503 0.3781 0.6931 0.045 Uiso 1 1 calc R . . 
C5 C 0.5662(2) 0.45493(17) 0.73625(15) 0.0310(4) Uani 1 1 d . . . 
H5 H 0.4927 0.5220 0.7258 0.037 Uiso 1 1 calc R . . 
C28 C 1.2022(3) 0.6126(2) 0.96318(17) 0.0459(6) Uani 1 1 d . . . 
C29 C 0.7310(2) 0.81038(18) 0.25680(15) 0.0340(4) Uani 1 1 d . . . 
O7 O 0.0796(7) -0.0149(6) 0.0160(5) 0.192(2) Uiso 1 1 d . . . 
C30 C 0.1304(11) 0.0615(8) 0.0384(7) 0.171(3) Uiso 1 1 d . . . 
  
loop_ 
 _atom_site_aniso_label 
 _atom_site_aniso_U_11 
 _atom_site_aniso_U_22 
 _atom_site_aniso_U_33 
 _atom_site_aniso_U_23 
 _atom_site_aniso_U_13 
 _atom_site_aniso_U_12 
Mn1 0.01967(14) 0.01853(14) 0.01919(14) -0.00402(10) -0.00188(10) -0.00467(10) 
S1 0.0228(2) 0.0376(3) 0.0306(3) -0.0005(2) -0.00600(18) -0.00742(19) 
S2 0.0272(2) 0.0283(2) 0.0257(2) -0.00362(17) -0.00264(17) -0.01038(18) 
F1 0.0565(10) 0.1029(14) 0.0377(8) 0.0233(8) -0.0144(7) -0.0408(10) 
F2 0.0442(9) 0.0939(14) 0.0609(10) 0.0181(9) -0.0335(8) -0.0178(9) 
F3 0.0690(11) 0.0903(13) 0.0445(9) -0.0194(9) -0.0153(8) -0.0286(10) 
F4 0.0567(9) 0.0563(9) 0.0555(9) -0.0335(8) 0.0017(7) -0.0122(7) 
F5 0.0572(9) 0.0854(12) 0.0342(7) -0.0043(7) 0.0037(7) -0.0473(9) 
F6 0.0470(8) 0.0641(9) 0.0383(7) -0.0054(7) -0.0172(6) -0.0168(7) 
O1 0.0271(7) 0.0532(9) 0.0282(7) -0.0103(7) -0.0087(6) -0.0009(7) 
O2 0.0440(10) 0.0424(10) 0.0674(13) -0.0110(9) -0.0079(9) -0.0101(8) 
O3 0.0357(8) 0.0522(10) 0.0429(9) -0.0019(8) 0.0013(7) -0.0184(8) 
O4 0.0355(8) 0.0414(9) 0.0384(9) -0.0005(7) -0.0112(7) -0.0061(7) 
O5 0.0558(10) 0.0313(8) 0.0433(9) -0.0125(7) -0.0137(8) -0.0011(7) 
O6 0.0491(10) 0.0683(12) 0.0402(9) -0.0062(8) 0.0055(8) -0.0388(9) 
N2 0.0251(7) 0.0211(7) 0.0196(7) -0.0035(5) 0.0015(6) -0.0096(6) 
N1 0.0221(7) 0.0238(7) 0.0214(7) -0.0030(6) -0.0021(6) -0.0059(6) 
N4 0.0291(8) 0.0219(7) 0.0285(8) -0.0059(6) -0.0037(6) -0.0083(6) 
N3 0.0278(8) 0.0279(8) 0.0223(8) -0.0044(6) 0.0003(6) -0.0057(6) 
N5 0.0250(7) 0.0233(7) 0.0241(7) -0.0049(6) 0.0026(6) -0.0089(6) 
C27 0.0311(10) 0.0270(9) 0.0312(10) -0.0055(7) 0.0027(8) -0.0136(8) 
C26 0.0306(10) 0.0375(11) 0.0324(10) -0.0051(8) 0.0069(8) -0.0151(8) 
C25 0.0321(10) 0.0371(11) 0.0339(11) -0.0132(9) 0.0102(8) -0.0084(9) 
C24 0.0329(10) 0.0283(9) 0.0327(10) -0.0116(8) 0.0063(8) -0.0083(8) 
C23 0.0258(9) 0.0220(8) 0.0223(8) -0.0047(6) 0.0004(7) -0.0072(7) 
C22 0.0289(9) 0.0217(8) 0.0272(9) -0.0064(7) 0.0051(7) -0.0096(7) 
C2 0.0297(9) 0.0286(9) 0.0200(8) -0.0040(7) -0.0028(7) -0.0136(7) 
C1 0.0243(9) 0.0314(9) 0.0277(9) -0.0015(7) -0.0059(7) -0.0118(7) 
C16 0.0309(9) 0.0263(9) 0.0213(8) 0.0010(7) -0.0059(7) -0.0079(7) 
C17 0.0289(9) 0.0216(8) 0.0231(8) -0.0040(7) -0.0005(7) -0.0059(7) 
C18 0.0472(12) 0.0230(9) 0.0341(11) 0.0000(8) -0.0067(9) -0.0090(8) 
C19 0.0605(15) 0.0249(10) 0.0427(13) -0.0024(9) -0.0044(11) -0.0194(10) 
C20 0.0464(13) 0.0331(11) 0.0462(13) -0.0116(9) -0.0033(10) -0.0208(10) 
C21 0.0362(11) 0.0281(9) 0.0380(11) -0.0081(8) -0.0074(8) -0.0133(8) 
C10 0.0242(9) 0.0296(9) 0.0297(10) -0.0055(8) -0.0013(7) 0.0003(7) 
C11 0.0259(9) 0.0315(9) 0.0271(9) -0.0092(8) 0.0013(7) -0.0058(7) 
C12 0.0302(11) 0.0576(15) 0.0366(12) -0.0127(11) 0.0061(9) -0.0065(10) 
C13 0.0422(13) 0.0761(19) 0.0326(12) -0.0144(12) 0.0156(10) -0.0191(13) 
C14 0.0551(15) 0.0551(14) 0.0230(10) -0.0019(10) 0.0035(10) -0.0183(12) 
C15 0.0385(11) 0.0394(11) 0.0234(9) -0.0019(8) -0.0028(8) -0.0079(9) 
C3 0.0299(9) 0.0249(8) 0.0200(8) -0.0037(7) 0.0021(7) -0.0127(7) 
C4 0.0282(9) 0.0270(9) 0.0206(8) -0.0044(7) 0.0045(7) -0.0140(7) 
C9 0.0316(10) 0.0286(9) 0.0317(10) -0.0016(8) -0.0015(8) -0.0136(8) 
C8 0.0384(11) 0.0281(10) 0.0417(12) -0.0072(9) 0.0054(9) -0.0138(8) 
C7 0.0437(12) 0.0381(11) 0.0399(12) -0.0144(9) 0.0083(9) -0.0252(10) 
C6 0.0337(11) 0.0459(12) 0.0393(12) -0.0091(9) 0.0006(9) -0.0233(9) 
C5 0.0260(9) 0.0323(10) 0.0349(10) -0.0061(8) 0.0039(8) -0.0139(8) 
C28 0.0367(12) 0.0644(16) 0.0350(12) 0.0073(11) -0.0163(9) -0.0189(11) 
C29 0.0315(10) 0.0422(11) 0.0318(10) -0.0079(9) -0.0018(8) -0.0165(9) 
  
_geom_special_details 
; 
 All esds (except the esd in the dihedral angle between two l.s. planes) 
 are estimated using the full covariance matrix.  The cell esds are taken 
 into account individually in the estimation of esds in distances, angles 
 and torsion angles; correlations between esds in cell parameters are only 
 used when they are defined by crystal symmetry.  An approximate (isotropic) 
 treatment of cell esds is used for estimating esds involving l.s. planes. 
; 
  
loop_ 
 _geom_bond_atom_site_label_1 
 _geom_bond_atom_site_label_2 
 _geom_bond_distance 
 _geom_bond_site_symmetry_2 
 _geom_bond_publ_flag 
Mn1 O1 2.1195(15) . ? 
Mn1 N4 2.2267(16) . ? 
Mn1 N3 2.2396(16) . ? 
Mn1 N5 2.2793(16) . ? 
Mn1 N1 2.2935(16) . ? 
Mn1 N2 2.3054(15) . ? 
S1 O3 1.4277(17) . ? 
S1 O2 1.428(2) . ? 
S1 O1 1.4622(16) . ? 
S1 C28 1.819(3) . ? 
S2 O4 1.4337(17) . ? 
S2 O6 1.4361(17) . ? 
S2 O5 1.4364(17) . ? 
S2 C29 1.824(2) . ? 
F1 C28 1.335(3) . ? 
F2 C28 1.320(3) . ? 
F3 C28 1.323(4) . ? 
F4 C29 1.336(3) . ? 
F5 C29 1.330(2) . ? 
F6 C29 1.330(3) . ? 
N2 C22 1.472(2) . ? 
N2 C2 1.488(2) . ? 
N2 C3 1.499(2) . ? 
N1 C10 1.475(2) . ? 
N1 C16 1.477(2) . ? 
N1 C1 1.487(2) . ? 
N4 C17 1.342(3) . ? 
N4 C21 1.347(3) . ? 
N3 C11 1.341(3) . ? 
N3 C15 1.347(3) . ? 
N5 C23 1.337(2) . ? 
N5 C27 1.346(2) . ? 
C27 C26 1.373(3) . ? 
C27 H27 0.9500 . ? 
C26 C25 1.390(3) . ? 
C26 H26 0.9500 . ? 
C25 C24 1.381(3) . ? 
C25 H25 0.9500 . ? 
C24 C23 1.389(3) . ? 
C24 H24 0.9500 . ? 
C23 C22 1.502(2) . ? 
C22 H22A 0.9900 . ? 
C22 H22B 0.9900 . ? 
C2 C1 1.518(3) . ? 
C2 H2A 0.9900 . ? 
C2 H2B 0.9900 . ? 
C1 H1A 0.9900 . ? 
C1 H1B 0.9900 . ? 
C16 C17 1.512(3) . ? 
C16 H16A 0.9900 . ? 
C16 H16B 0.9900 . ? 
C17 C18 1.393(3) . ? 
C18 C19 1.379(3) . ? 
C18 H18 0.9500 . ? 
C19 C20 1.378(4) . ? 
C19 H19 0.9500 . ? 
C20 C21 1.374(3) . ? 
C20 H20 0.9500 . ? 
C21 H21 0.9500 . ? 
C10 C11 1.506(3) . ? 
C10 H10A 0.9900 . ? 
C10 H10B 0.9900 . ? 
C11 C12 1.387(3) . ? 
C12 C13 1.389(4) . ? 
C12 H12 0.9500 . ? 
C13 C14 1.375(4) . ? 
C13 H13 0.9500 . ? 
C14 C15 1.382(3) . ? 
C14 H14 0.9500 . ? 
C15 H15 0.9500 . ? 
C3 C4 1.513(3) . ? 
C3 H3A 0.9900 . ? 
C3 H3B 0.9900 . ? 
C4 C5 1.388(3) . ? 
C4 C9 1.397(3) . ? 
C9 C8 1.390(3) . ? 
C9 H9 0.9500 . ? 
C8 C7 1.383(4) . ? 
C8 H8 0.9500 . ? 
C7 C6 1.380(4) . ? 
C7 H7 0.9500 . ? 
C6 C5 1.386(3) . ? 
C6 H6 0.9500 . ? 
C5 H5 0.9500 . ? 
O7 C30 1.423(10) . ? 
O7 O7 1.560(12) 2 ? 
  
loop_ 
 _geom_angle_atom_site_label_1 
 _geom_angle_atom_site_label_2 
 _geom_angle_atom_site_label_3 
 _geom_angle 
 _geom_angle_site_symmetry_1 
 _geom_angle_site_symmetry_3 
 _geom_angle_publ_flag 
O1 Mn1 N4 93.66(7) . . ? 
O1 Mn1 N3 84.95(6) . . ? 
N4 Mn1 N3 105.62(6) . . ? 
O1 Mn1 N5 91.59(6) . . ? 
N4 Mn1 N5 88.92(6) . . ? 
N3 Mn1 N5 165.22(6) . . ? 
O1 Mn1 N1 153.03(6) . . ? 
N4 Mn1 N1 74.68(6) . . ? 
N3 Mn1 N1 75.30(6) . . ? 
N5 Mn1 N1 112.00(6) . . ? 
O1 Mn1 N2 120.96(6) . . ? 
N4 Mn1 N2 141.35(6) . . ? 
N3 Mn1 N2 94.86(6) . . ? 
N5 Mn1 N2 74.61(5) . . ? 
N1 Mn1 N2 79.51(6) . . ? 
O3 S1 O2 117.46(12) . . ? 
O3 S1 O1 112.90(11) . . ? 
O2 S1 O1 114.01(11) . . ? 
O3 S1 C28 104.60(12) . . ? 
O2 S1 C28 105.21(13) . . ? 
O1 S1 C28 100.23(11) . . ? 
O4 S2 O6 114.63(12) . . ? 
O4 S2 O5 114.35(11) . . ? 
O6 S2 O5 115.77(12) . . ? 
O4 S2 C29 103.48(10) . . ? 
O6 S2 C29 103.87(10) . . ? 
O5 S2 C29 102.38(11) . . ? 
S1 O1 Mn1 132.17(10) . . ? 
C22 N2 C2 110.24(15) . . ? 
C22 N2 C3 109.05(14) . . ? 
C2 N2 C3 112.90(14) . . ? 
C22 N2 Mn1 107.78(11) . . ? 
C2 N2 Mn1 102.10(10) . . ? 
C3 N2 Mn1 114.51(11) . . ? 
C10 N1 C16 110.39(15) . . ? 
C10 N1 C1 111.29(15) . . ? 
C16 N1 C1 112.02(15) . . ? 
C10 N1 Mn1 108.42(12) . . ? 
C16 N1 Mn1 106.22(11) . . ? 
C1 N1 Mn1 108.30(11) . . ? 
C17 N4 C21 118.64(17) . . ? 
C17 N4 Mn1 115.87(12) . . ? 
C21 N4 Mn1 125.47(14) . . ? 
C11 N3 C15 118.71(18) . . ? 
C11 N3 Mn1 116.10(13) . . ? 
C15 N3 Mn1 124.88(14) . . ? 
C23 N5 C27 117.92(16) . . ? 
C23 N5 Mn1 115.31(12) . . ? 
C27 N5 Mn1 126.76(13) . . ? 
N5 C27 C26 123.52(19) . . ? 
N5 C27 H27 118.2 . . ? 
C26 C27 H27 118.2 . . ? 
C27 C26 C25 117.98(18) . . ? 
C27 C26 H26 121.0 . . ? 
C25 C26 H26 121.0 . . ? 
C24 C25 C26 119.42(19) . . ? 
C24 C25 H25 120.3 . . ? 
C26 C25 H25 120.3 . . ? 
C25 C24 C23 118.71(19) . . ? 
C25 C24 H24 120.6 . . ? 
C23 C24 H24 120.6 . . ? 
N5 C23 C24 122.43(17) . . ? 
N5 C23 C22 117.34(16) . . ? 
C24 C23 C22 120.09(17) . . ? 
N2 C22 C23 113.15(15) . . ? 
N2 C22 H22A 108.9 . . ? 
C23 C22 H22A 108.9 . . ? 
N2 C22 H22B 108.9 . . ? 
C23 C22 H22B 108.9 . . ? 
H22A C22 H22B 107.8 . . ? 
N2 C2 C1 111.97(15) . . ? 
N2 C2 H2A 109.2 . . ? 
C1 C2 H2A 109.2 . . ? 
N2 C2 H2B 109.2 . . ? 
C1 C2 H2B 109.2 . . ? 
H2A C2 H2B 107.9 . . ? 
N1 C1 C2 111.58(15) . . ? 
N1 C1 H1A 109.3 . . ? 
C2 C1 H1A 109.3 . . ? 
N1 C1 H1B 109.3 . . ? 
C2 C1 H1B 109.3 . . ? 
H1A C1 H1B 108.0 . . ? 
N1 C16 C17 110.62(15) . . ? 
N1 C16 H16A 109.5 . . ? 
C17 C16 H16A 109.5 . . ? 
N1 C16 H16B 109.5 . . ? 
C17 C16 H16B 109.5 . . ? 
H16A C16 H16B 108.1 . . ? 
N4 C17 C18 121.63(19) . . ? 
N4 C17 C16 116.20(16) . . ? 
C18 C17 C16 122.13(18) . . ? 
C19 C18 C17 118.8(2) . . ? 
C19 C18 H18 120.6 . . ? 
C17 C18 H18 120.6 . . ? 
C20 C19 C18 119.5(2) . . ? 
C20 C19 H19 120.3 . . ? 
C18 C19 H19 120.3 . . ? 
C21 C20 C19 118.8(2) . . ? 
C21 C20 H20 120.6 . . ? 
C19 C20 H20 120.6 . . ? 
N4 C21 C20 122.5(2) . . ? 
N4 C21 H21 118.7 . . ? 
C20 C21 H21 118.7 . . ? 
N1 C10 C11 112.22(16) . . ? 
N1 C10 H10A 109.2 . . ? 
C11 C10 H10A 109.2 . . ? 
N1 C10 H10B 109.2 . . ? 
C11 C10 H10B 109.2 . . ? 
H10A C10 H10B 107.9 . . ? 
N3 C11 C12 122.0(2) . . ? 
N3 C11 C10 116.77(16) . . ? 
C12 C11 C10 121.17(19) . . ? 
C11 C12 C13 118.5(2) . . ? 
C11 C12 H12 120.7 . . ? 
C13 C12 H12 120.7 . . ? 
C14 C13 C12 119.8(2) . . ? 
C14 C13 H13 120.1 . . ? 
C12 C13 H13 120.1 . . ? 
C13 C14 C15 118.4(2) . . ? 
C13 C14 H14 120.8 . . ? 
C15 C14 H14 120.8 . . ? 
N3 C15 C14 122.6(2) . . ? 
N3 C15 H15 118.7 . . ? 
C14 C15 H15 118.7 . . ? 
N2 C3 C4 115.22(15) . . ? 
N2 C3 H3A 108.5 . . ? 
C4 C3 H3A 108.5 . . ? 
N2 C3 H3B 108.5 . . ? 
C4 C3 H3B 108.5 . . ? 
H3A C3 H3B 107.5 . . ? 
C5 C4 C9 118.71(18) . . ? 
C5 C4 C3 120.91(18) . . ? 
C9 C4 C3 120.38(18) . . ? 
C8 C9 C4 120.3(2) . . ? 
C8 C9 H9 119.9 . . ? 
C4 C9 H9 119.9 . . ? 
C7 C8 C9 120.3(2) . . ? 
C7 C8 H8 119.8 . . ? 
C9 C8 H8 119.8 . . ? 
C6 C7 C8 119.7(2) . . ? 
C6 C7 H7 120.2 . . ? 
C8 C7 H7 120.2 . . ? 
C7 C6 C5 120.3(2) . . ? 
C7 C6 H6 119.8 . . ? 
C5 C6 H6 119.8 . . ? 
C6 C5 C4 120.7(2) . . ? 
C6 C5 H5 119.7 . . ? 
C4 C5 H5 119.7 . . ? 
F2 C28 F3 108.1(2) . . ? 
F2 C28 F1 107.9(2) . . ? 
F3 C28 F1 107.8(2) . . ? 
F2 C28 S1 111.3(2) . . ? 
F3 C28 S1 111.19(17) . . ? 
F1 C28 S1 110.38(18) . . ? 
F5 C29 F6 107.70(19) . . ? 
F5 C29 F4 107.15(19) . . ? 
F6 C29 F4 107.16(18) . . ? 
F5 C29 S2 111.14(15) . . ? 
F6 C29 S2 111.68(15) . . ? 
F4 C29 S2 111.77(16) . . ? 
C30 O7 O7 121.2(9) . 2 ? 
  
_diffrn_measured_fraction_theta_max    0.982 
_diffrn_reflns_theta_full              28.31 
_diffrn_measured_fraction_theta_full   0.982 
_refine_diff_density_max    1.721 
_refine_diff_density_min   -0.612 
_refine_diff_density_rms    0.074 
